# Supplementary material for: Highly efficient polymer solar cells with printed photoactive layer: rational process transfer from spin-coating
Source: Royal Society of Chemistry journal article supplement (doi:10.1039/c6ta06258j), 2016-01-01
Supplement: c6ta06258j1.pdf [file c6ta06258j1.pdf]

**Note and references:**

Electronic Supplementary Information (ESI) available. See DOI:

## Highly Efficient Printed Polymer Solar Cells: Rational Process Transfer from Spin-Coating

K. Zhao,<sup>\*,§</sup> H. Hu,<sup>§</sup> E. Spada, L. K. Jagadamma, B. Yan, M. Abdelsamie, Y. Yang, L. Yu, R. Munir, R. Li, G. O. Ngongang Ndjawa, A. Amassian\*

**Table S1.** Typical figures of merit for devices fabricated by blade-coating methods in ambient air with respect to the blade-coating speed (slow and high-speed range) at a fixed angle of attack (45°) using the same formulation (25 mg/mL of PTB7:PC<sub>71</sub>BM in CB with 3 v/v% DIO). Blade-coating experiments were performed in air.

| PTB7:PC <sub>71</sub> BM        |     | J <sub>sc</sub><br>[mA/cm <sup>2</sup> ] | V <sub>oc</sub><br>[V] | FF<br>[%] | PCE <sub>ave</sub><br>[%] | PCE <sub>max</sub><br>[%] | Thickness<br>[nm] |
|---------------------------------|-----|------------------------------------------|------------------------|-----------|---------------------------|---------------------------|-------------------|
|                                 | 0.5 | 5.72±0.39                                | 0.70±0.01              | 59.2±2.0  | 2.4±0.21                  | 2.7                       | 23                |
| Blade-coating<br>(speed [mm/s]) | 1   | 6.61±0.71                                | 0.63±0.01              | 47.1±1.8  | 2.0±0.19                  | 2.3                       | 18                |
|                                 | 3   | 6.51±0.50                                | 0.69±0.01              | 61.5±1.9  | 2.7±0.11                  | 3.0                       | 20                |
|                                 | 75  | 17.58±0.53                               | 0.69±0.01              | 52.1±2.4  | 6.4±0.17                  | 6.6                       | 223               |
|                                 | 100 | 9.72±0.39                                | 0.61±0.02              | 34.5±2.3  | 2.1±0.10                  | 2.3                       | 430               |

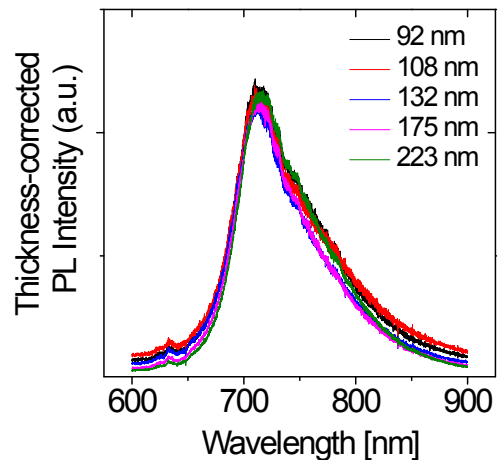

**Figure S1.** Thickness-corrected photoluminescence spectra (PL) of PTB7:PC<sub>71</sub>BM films with different thickness fabricated by blade-coating.

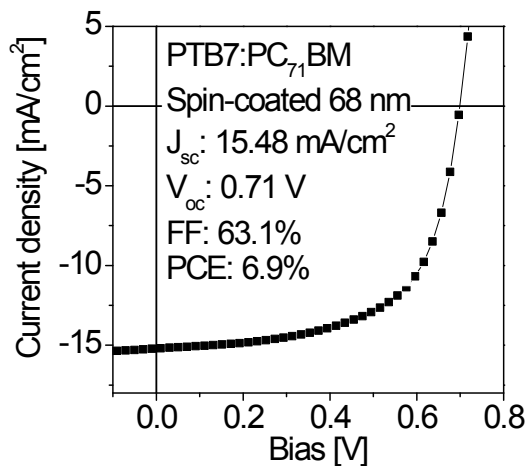

**Figure S2.** *J-V* characteristic of the spin-coated PTB7:PC<sub>71</sub>BM device fabricated at a fast spin-speed 3500 rpm.

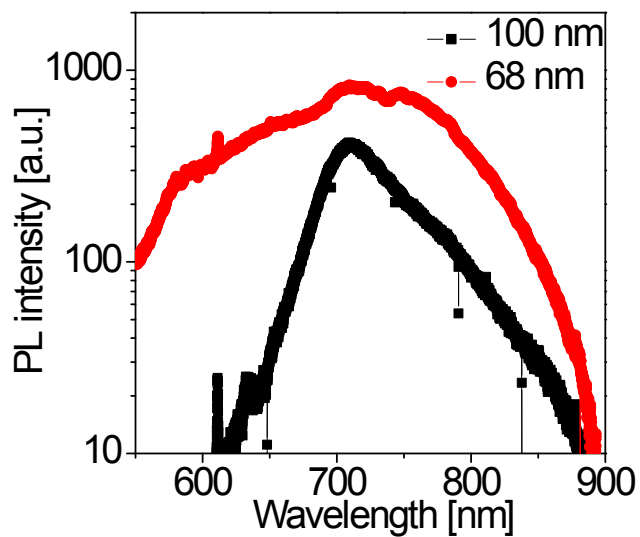

**Figure S3.** Thickness-corrected photoluminescence spectra (PL) of PTB7:PC<sub>71</sub>BM films fabricated at an optimum spin-speed 1000 rpm and a fast spin-speed 3500 rpm.

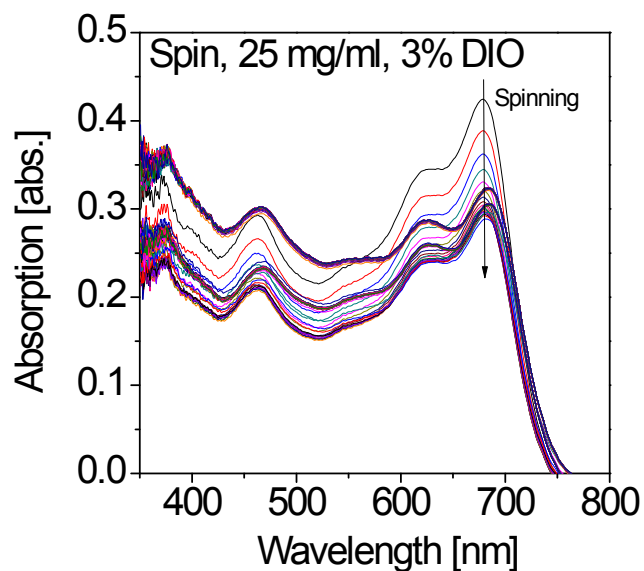

**Figure S4.** Evolution of UV-Vis absorption of PTB7:PC<sub>71</sub>BM blends during spin-coating.

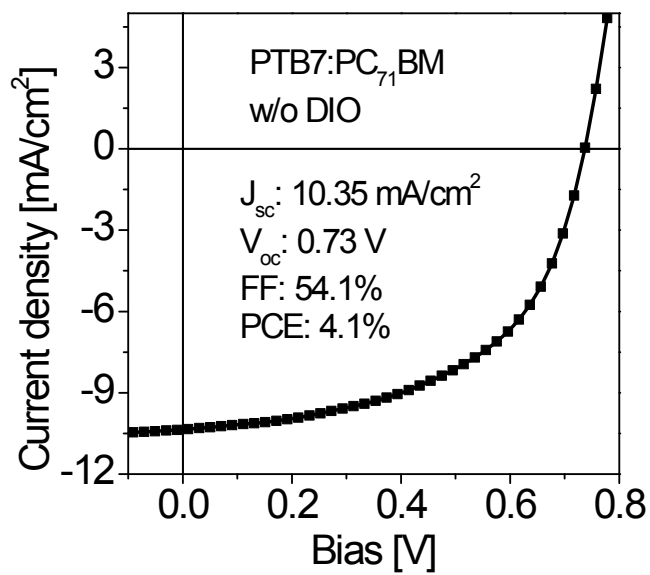

**Figure S5.** *J-V* characteristic of the spin-coated PTB7:PC<sub>71</sub>BM device fabricated without DIO.

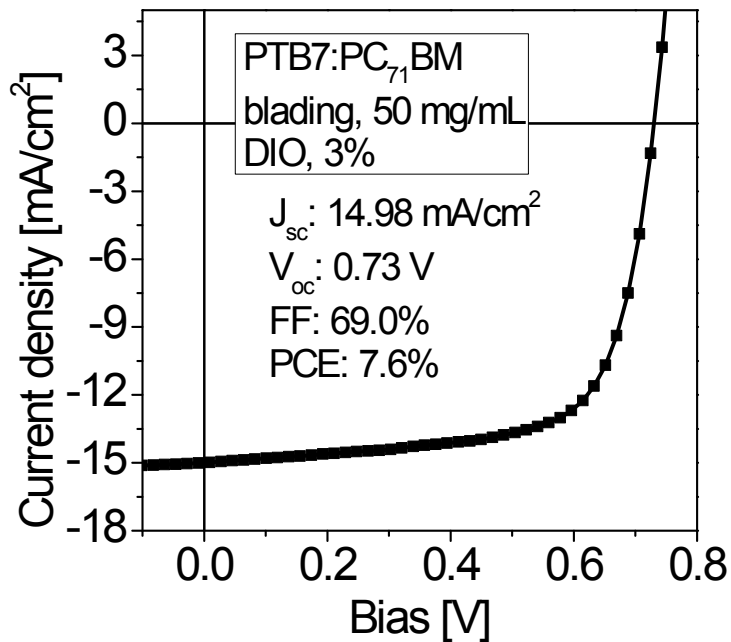

**Figure S6.**  $J$ - $V$  characteristic of the blade-coated PTB7:PC<sub>71</sub>BM device fabricated with solute concentration of 50 mg/mL, 3% DIO and at base temperature 60 °C.

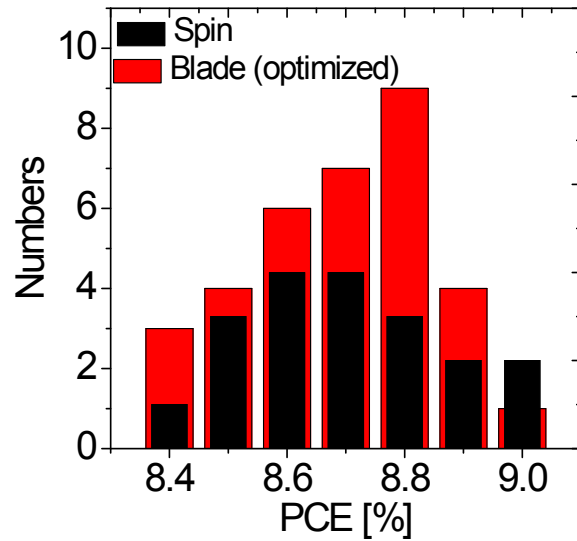

**Figure S7.** The power conversion efficiency (PCE) distribution of the blade-cast and spin-cast PTB7:PC<sub>71</sub>BM devices using the optimal formation.

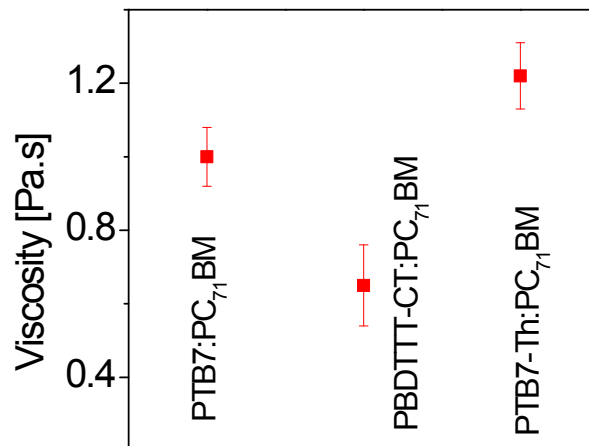

**Figure S8.** The viscosity of three blends solutions with concentration of 25 mg/mL and 3% DIO as additive measured under ambient condition.

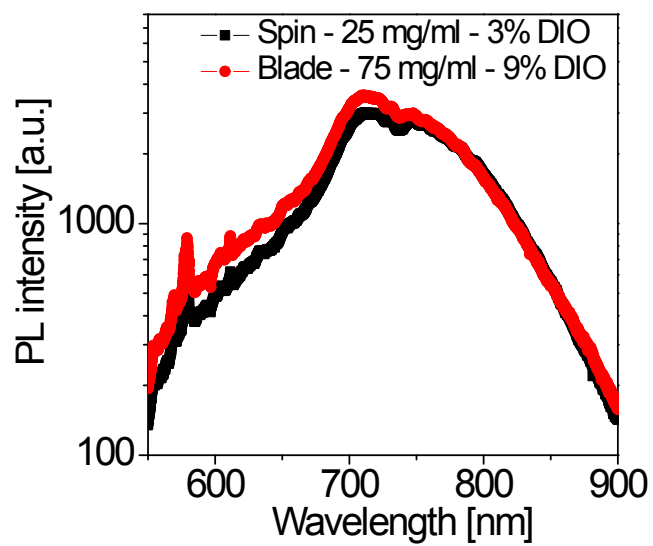

**Figure S9.** Thickness-corrected photoluminescence spectra (PL) of the optimal spin-cast and blade-cast PBDTTT-CT:PC<sub>71</sub>BM films.
